# Supplementary material for: Efficacy and safety of ginkgo preparations for attention deficit hyperactivity disorder: a systematic review protocol
Source: PubMed Central journal article supplement — BMJ Open. 2018 Feb 20;8(2):e020434. doi: 10.1136/bmjopen-2017-020434 (PMC5855296; doi:10.1136/bmjopen-2017-020434), 2018-02-20

# BMJ Open

BMJ Open is committed to open peer review. As part of this commitment we make the peer review history of every article we publish publicly available.

When an article is published we post the peer reviewers' comments and the authors' responses online. We also post the versions of the paper that were used during peer review. These are the versions that the peer review comments apply to.

The versions of the paper that follow are the versions that were submitted during the peer review process. They are not the versions of record or the final published versions. They should not be cited or distributed as the published version of this manuscript.

BMJ Open is an open access journal and the full, final, typeset and author-corrected version of record of the manuscript is available on our site with no access controls, subscription charges or pay-per-view fees (<http://bmjopen.bmj.com>).

If you have any questions on BMJ Open's open peer review process please email [info.bmjopen@bmj.com](mailto:info.bmjopen@bmj.com)

# BMJ Open

## The Efficiency and Safety of Ginkgo Preparations for Attention Deficit Hyperactivity Disorder: A Systematic Review Protocol

|                               |                                                                                                                                                                                                                                                                                                                                                                                                                                                                                                                                                                                                                                   |
|-------------------------------|-----------------------------------------------------------------------------------------------------------------------------------------------------------------------------------------------------------------------------------------------------------------------------------------------------------------------------------------------------------------------------------------------------------------------------------------------------------------------------------------------------------------------------------------------------------------------------------------------------------------------------------|
| Journal:                      | <i>BMJ Open</i>                                                                                                                                                                                                                                                                                                                                                                                                                                                                                                                                                                                                                   |
| Manuscript ID                 | bmjopen-2017-020434                                                                                                                                                                                                                                                                                                                                                                                                                                                                                                                                                                                                               |
| Article Type:                 | Protocol                                                                                                                                                                                                                                                                                                                                                                                                                                                                                                                                                                                                                          |
| Date Submitted by the Author: | 03-Nov-2017                                                                                                                                                                                                                                                                                                                                                                                                                                                                                                                                                                                                                       |
| Complete List of Authors:     | He, Sufei; Tianjin University of Traditional Chinese Medicine, Collaborative Innovation Center of Modern Chinese Medicine<br>Wang, Miao; Tianjin University of Traditional Chinese Medicine,, College of Chinese Medicine,<br>Si, Jinhua; Tianjin University of Traditional Chinese Medicine, Library<br>Zhang, Tianyi; Tianjin University of Traditional Chinese Medicine, Second Affiliated Hospital<br>Cui, Hong; Tianjin University of Traditional Chinese Medicine, First Affiliated Hospital<br>Gao, Xiumei; Tianjin University of Traditional Chinese Medicine, Collaborative Innovation Center of Modern Chinese Medicine |
| Keywords:                     | Attention Deficit Disorder with Hyperactivity, Biological Products, Ginkgo Preparations, Efficiency, Safety                                                                                                                                                                                                                                                                                                                                                                                                                                                                                                                       |
|                               |                                                                                                                                                                                                                                                                                                                                                                                                                                                                                                                                                                                                                                   |

SCHOLARONE™  
Manuscripts

Only

1  
2  
3  
4 1 The Efficiency and Safety of Ginkgo Preparations for Attention Deficit Hyperactivity Disorder: A  
5  
6 2 Systematic Review Protocol

7  
8 3 Sufei He<sup>1#</sup>, Miao Wang<sup>2#</sup>, Jinhua Si<sup>3</sup>, Tianyi Zhang<sup>4</sup>, Hong Cui<sup>5</sup>, Xiumei Gao<sup>1\*</sup>

9 4 1. Collaborative Innovation Center of Modern Chinese Medicine, Tianjin University of Traditional  
10 5 Chinese Medicine, Tianjin 300193, P.R. China.

11 6 2. College of Chinese Medicine, Tianjin University of Traditional Chinese Medicine, Tianjin  
12 7 300193, P.R. China.

13 8 3. Library, Tianjin University of Traditional Chinese Medicine, Tianjin 300193, P.R. China.

14 9 4. Second Affiliated Hospital, Tianjin University of Traditional Chinese Medicine, Tianjin 300193,  
15 10 P.R. China.

16 11 5. First Affiliated Hospital, Tianjin University of Traditional Chinese Medicine, Tianjin 300193,  
17 12 P.R. China.

18 13 # Authors contributed equally.

19 14 \* Correspondence to Prof. Xiumei Gao, gaoxiumei1984@hotmail.com.

20  
21  
22  
23  
24 15 **Abstract**

25 16 **Introduction** Attention Deficit Hyperactivity Disorder (ADHD) is one of the most commonly  
26 17 diagnosed and treated childhood psychiatric disorders. Ginkgo preparations have been used in  
27 18 treating ADHD. The study aims to assess the efficiency and safety of Ginkgo preparations as  
28 19 treatment for ADHD through current published evidence.

29 20 **Materials and methods** We will conduct the comprehensive search for the randomised controlled  
30 21 trials to evaluate the effectiveness and tolerance of ginkgo preparations. The following databases  
31 22 will be searched from their inception until October 2017: Medline, Embase, the Cochrane Central  
32 23 Register of Controlled Trials (CENTRAL), Web of Science (science and social science citation  
33 24 index), China Biology Medicine Disc (CBMdisc), China National Knowledge Infrastructure  
34 25 Database (CNKI), Wanfang Database and Chinese Scientific Journals Database (VIP). Selection  
35 26 of studies, data extraction and assessment of risk of bias will be conducted independently by two  
36 27 authors.

37 28 **Ethics and dissemination** This systematic review does not require ethics approval. It will be  
38 29 published in a peer-reviewed journal.

39 30 **PROSPERO registration number** CRD42017077190

40  
41  
42  
43  
44 32 **Strengths and limitations of this study**

45 33 This systematic review will evaluate the efficacy and tolerance of all types of ginkgo preparations  
46 34 in treating ADHD and aims to provide appropriate clinical evidence for clinicians, patients and  
47 35 parents.

48 36 This review will collect data by unbiased search of various databases without language  
49 37 restrictions.

50 38 Clinical heterogeneity maybe exists regarding of changes in different types of ginkgo preparations,  
51 39 dosage, duration and the treatment combined.

52  
53  
54  
55 41 **Introduction**

## 42 **Description of the condition of ADHD treatment**

43 The prevalence of Attention deficit hyperactivity disorder (ADHD) in children and adolescents is  
44 as high as 3.4% in the general population<sup>[1]</sup>; and it is considered as one of the most commonly  
45 diagnosed and treated childhood psychiatric disorders<sup>[2]</sup>. It rises to 6.26% in China<sup>[3]</sup>. ADHD is a  
46 childhood-onset neurodevelopmental disorder, which can persist into adolescence and adulthood,  
47 appearing with a high societal burden. The main symptoms consist of inattention and  
48 hyperactivity/impulsivity, often accompanied by other neurodevelopment disorders such as autism  
49 spectrum disorder<sup>[4]</sup> and intellectual disability<sup>[5]</sup>. A large proportion of adolescents and adults with  
50 ADHD perform antisocial behavior and criminal activities, including conduct disorder,  
51 oppositional defiant disorder<sup>[6]</sup>, risk of crashing<sup>[7]</sup>, sexual offenses<sup>[8]</sup> and arson<sup>[9]</sup>, especially among  
52 arrested, convicted and imprisoned adolescents and adults, which, has been increasingly  
53 considered as a severe social issue.

54 Stimulants such as methylphenidate used for the first-line treatments will lead to substance use  
55 disorders (SUDs), one among the most common comorbid psychiatric disorders in adolescent or  
56 adult patients<sup>[10-11]</sup>. Related adverse side-effects include cardiovascular events, insomnia, appetite  
57 loss, hypoevolutism, gastrointestinal symptoms, and tics<sup>[12]</sup>. The side effects, nonresponse, abuse  
58 and misuse of conventional pharmacological treatments call for complementary or alternative  
59 medical treatments for ADHD with mild side-effect, such as plant-based medications,  
60 acupuncture<sup>[13]</sup> and music therapy<sup>[14]</sup>.

## 61 **Description of the intervention**

62 Ginkgo preparations are made of compounds abstracted from ginkgo leaves, including tablets,  
63 capsules, granules, oral solution, aerosol and injection. Ginkgo preparations are one of the  
64 best-sale botanical dietary supplements all over the world. Evidence indicated that Ginkgo  
65 preparations can alleviate cognitive disorders<sup>[15]</sup>, cerebrovascular insufficiency, peripheral vascular  
66 disturbances, degenerative dementia, and various neuropsychiatric symptoms such as autism<sup>[16]</sup>,  
67 depression<sup>[17]</sup> and anxiety<sup>[18]</sup>. It's reported ginkgo preparations affected ADHD patients on both  
68 behaviors and cognitive aspects. The predominant behavioral effects were calming and improved  
69 frustration tolerance; while for cognition, ginkgo biloba induced willful cognition, discriminant  
70 attention and decreased irritability<sup>[19]</sup>.

## 71 **How the intervention might work**

72 Components isolated from ginkgo biloba contain terpene trilactones, flavonol glycosides,  
73 isoflavonoids, biflavones, proanthocyanidins, alkylphenols, carboxylic acids,  
74 4-O-Methylpyridoxine and polyphenols<sup>[20-22]</sup>. Preclinical evidence indicates that ginkgo flavonol  
75 glycosides are predominantly responsible for antioxidant activity<sup>[23]</sup>. The antioxidant activity of  
76 ginkgo flavonol glycosides can reduce the reactive oxygen species (ROS) induced oxidative stress,  
77 which contributes to neurodevelopmental disorders by causing membrane damage, changes in  
78 proteins' structure and function, lipid denaturation and DNA damage<sup>[24]</sup>. The terpene trilactones  
79 associated with neuroprotective properties<sup>[25]</sup>. Investigations showed that terpene trilactones  
80 attenuated the decrease of brain-derived neurotropic factor (BDNF), norepinephrine transporter  
81 (NET) and dopamine transporter (DAT)<sup>[26]</sup>, which were reported to be negatively related to the  
82 pathogenesis of ADHD<sup>[27-29]</sup>.

83 Considering that there hasn't been any updated and comprehensive quantitative review of ginkgo  
84 preparations to treat ADHD, it's important to investigate current evidence related to the  
85 effectiveness and tolerance of ginkgo preparations therapy for ADHD.

86

**87 Materials and methods****88 Registration information**

89 This systematic review protocol adhered to preferred reporting items for systematic review and  
90 meta analysis protocols (PRISMA-P) 2015<sup>[30]</sup>. The protocol was registered on PROSPERO and  
91 the registration number is CRD42017077190.

**92 Eligibility criteria****93 Types of study**

94 All prospective randomised controlled trials (RCTs) will be included in this systematic review, but  
95 trials without detailed data will be excluded. Abstracts with sufficient outcome data will be  
96 included. Cross-over trials will be included with the first phase of the data.

**97 Type of participants**

98 Children and adolescents between 6-14 years old with ADHD, or hyperkinetic disorder, diagnosed  
99 based on American Psychiatric Association's Diagnostic and Statistical Manual of Mental  
100 Disorders 4th edition (DSM-IV), the Diagnostic and Statistical Manual of Mental Disorders, Fifth  
101 Edition2(DSM-5), and Chinese Classification and Diagnosis of Mental Diseases-3rd edition  
102 (CMDD) will be included. There will be no limitations of sex.

**103 Type of interventions and controls**

104 Randomised studies of the Ginkgo preparations, either as the sole treatment or as an adjunct to  
105 other treatments which were applied in both groups (intervention and control groups) in the same  
106 manner, will be included. Ginkgo preparations include ginkgo biloba, ginkgolides, bilobalides,  
107 ginkgo biloba leaves dispersible tablet, Ginkgo Leaf Capsule, Ginkgo Leaves Soft gel Capsule,  
108 Ginkgo damole Injection, Yinxing damo, Ginkgo biloba granule, Yinxing Guttate Dropping Pill,  
109 Ginkgo biloba extract injection, Ginkgo distillate, Diterpene Ginkgolides Meglumine Injection,  
110 Ginkgolide Injection, Ginkgo Biloba Leaves Extract Oral Solution, Ginkgo Leaf Extract,  
111 Armillariella Mellea Powders Oral Solution, Yinxing Guttate Dropping Pills, Egb 761, Ginaton®,  
112 Tebonin forte, Rokan®, Tanakan®, Ginkobil®, GBE50, Kaveri® and Shuxuening Zhushuye. The  
113 control groups will include psychostimulants drug use, placebo use, psychotherapy and no  
114 treatment.

**115 Outcomes measures****116 Primary outcomes:**

117 The ADHD rating Scale-IV (ADHD-RS-IV).

118 Conner's Hyperactivity Index.

**119 Secondary outcomes:**

120 Quality of life.

121 Adverse effects/events.

**122 Data sources**

123 We will search the following electronic bibliographic databases: Medline, Embase, the Cochrane  
124 Central Register of Controlled Trials (CENTRAL), Web of Science (science and social science  
125 citation index), China Biology Medicine Disc (CBMdisc), China National Knowledge  
126 Infrastructure Database (CNKI), Wanfang Database and Chinese Scientific Journals Database  
127 (VIP). The search strategy will include terms relating to or describing the patients and intervention.  
128 The terms will be combined with the Cochrane MEDLINE filter for controlled trials of  
129 interventions.

1  
2  
3 130 **Search strategies**

4 131 The search of Medline will be conducted using the following terms: (ginkgo biloba OR  
5 132 ginkgolides OR bilobalides OR ginkgo biloba leaves dispersible tablet OR Ginkgo Leaf Capsule  
6 133 OR Ginkgo Leaves Soft gel Capsule OR Ginkgo damole Injection OR Yinxing damo OR Ginkgo  
7 134 biloba granule OR Yinxing Guttate Dropping Pill OR Ginkgo biloba extract injection OR ginkgo  
8 135 distillate OR Diterpene Ginkgolides Meglumine Injection OR Ginkgolide Injection OR Ginkgo  
9 136 Biloba Leaves Extract Oral Solution OR Ginkgo Leaf Extract OR Armillariella Mellea Powders  
10 137 Oral Solution OR Yinxing Guttate Dropping Pills OR Egb 761 OR Egb761 OR Ginaton® OR  
11 138 Tebonin forte OR Tanakan® OR Rökan® OR Ginkobil® OR GBE50 OR Kaveri® OR  
12 139 Shuxuening Zhushuye) AND (attention deficit hyperactivity disorder OR ADHD OR hyperkinetic  
13 140 disorders). The strategies will be modified for Embase, Cochrane, Web of Science, CBM, CNKI,  
14 141 Wanfang and VIP.

15 142 The search terms will be adapted for use with above bibliographic databases in combination with  
16 143 database-specific filters for controlled trials, where these are available. There will be no language  
17 144 restrictions. Studies published with no limitations will be sought. The date the searches conducted  
18 145 will be recorded.

19 146 **Data collection and analysis**

20 147 **Selection of studies**

21 148 Two authors (SF He and M WANG) will select studies by assessing the titles and abstracts after  
22 149 duplication removal. Full-text will be further reviewed for eligibility. Randomized controlled trials  
23 150 that investigated the efficacy and safety of meditation therapy in children or adolescents diagnosed  
24 151 with ADHD will be selected. Study selection will be documented and summarised in a  
25 152 PRISMA-compliant flow chart (Figure 1)(<http://www.prisma-statement.org>).

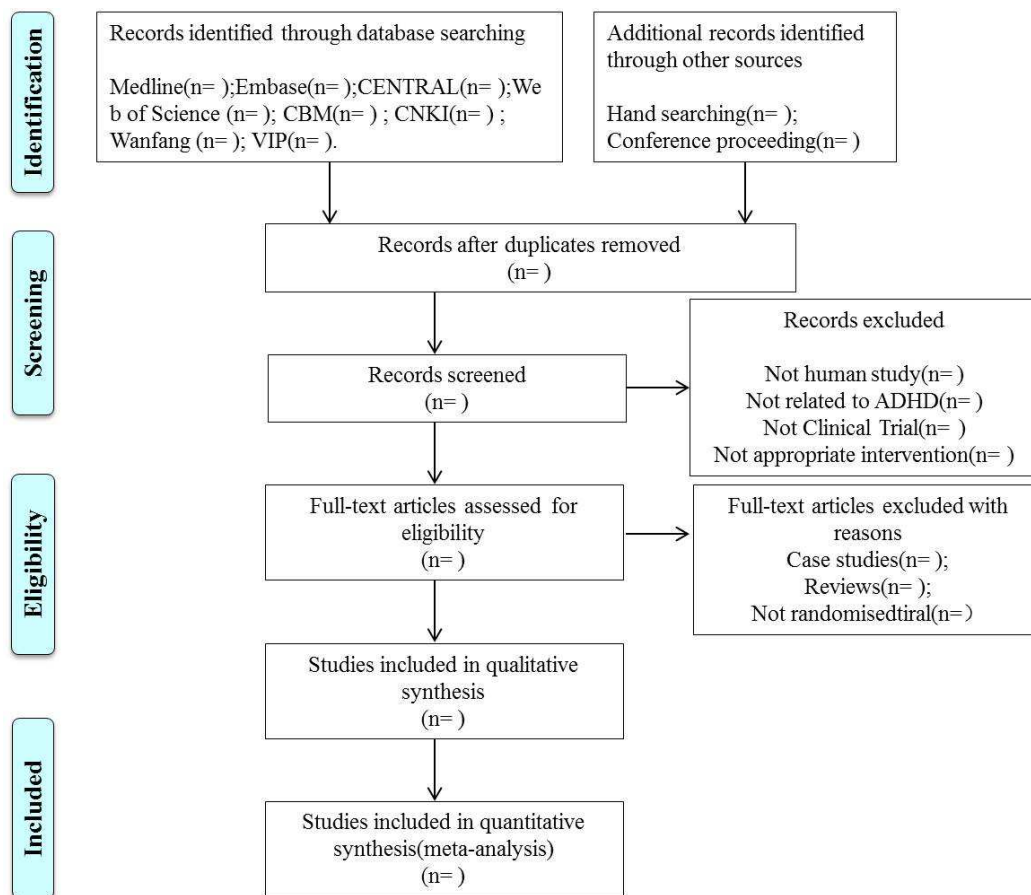

Figure 1 PRISMA flow diagram of searching and screening studies.

### Data extraction

Two authors (SF He and M Wang) will independently conduct the data extraction and risk of bias assessment using a predefined data extraction form. Information will be collected with first author, publication year, study design, intervention, dosage, diagnostic criteria, disease duration, number of participants allocation, dropout, duration, outcome, outcome results(e.g., ADHD-RS-IV, Conner's Hyperactivity Index, quality of life and adverse effects/events), follow-up periods, adverse effects/events. We will conduct GRADEpro software to make a summary of findings table.

Any disagreement between two authors will be resolved by discussion, finally judged by XM Gao. When the data are insufficient, TY Zhang will contact the author for additional information by mail.

### Assessment of risk of bias in included studies

We will assess risk of bias of included studies by risk of bias assessment tool according to the guidelines of the Cochrane Handbook<sup>[31]</sup>. Risk of bias in included studies will be classified as low, unclear and high by SF He and M Wang. The following will be assessed: random sequence generation, allocation sequence concealment, blinding of participants and personnel, blinding of outcome assessment, incomplete outcome data and selective outcome reporting.

### Data synthesis and analysis

A meta-analysis will be conducted with either random-effect model or fixed-effect model when studies are identified. We will use Review Manager 5.3.5 software (RevMan 5.3.5) to combine



175 data from trials. Mean differences (MD) or standardized mean differences (SMD) for continuous  
176 outcomes and risk ratio (RR) for dichotomous outcomes with 95% confidence intervals (95% CIs)  
177 will be pooled by RevMan 5.3.5. A systematic narrative synthesis will be done to summarise the  
178 relationship of the included studies if quantitative synthesis is not appropriate.

#### 179 ***Dealing with missing data***

180 We will attempt to collect data from original study investigators if possible for missing data or  
181 incomplete data. If failed to get data, we will consider estimating it.

#### 182 ***Assessment of reporting biases***

183 We will detect reporting biases by funnel plots if more than 10 studies are included. Asymmetry  
184 test will be conducted by Egger's method<sup>[32]</sup>.

#### 185 ***Assessment of heterogeneity***

186 Heterogeneity will be tested with chi-squared ( $\chi^2$ , or Chi2) test for P value.  $I^2$  will be calculated.  
187 We consider that the  $I^2$  value >50% indicates substantial heterogeneity<sup>[33]</sup>. We will either perform  
188 subgroup analysis or narrative descriptions according to different situations(e.g., lack of included  
189 trials).

#### 190 ***Subgroup analysis and investigation of heterogeneity***

191 Subgroup analysis will be performed to explore the source of heterogeneity by the type of ginkgo  
192 preparations, the dose, follow-up period and type of control.

#### 193 ***Sensitivity analysis***

194 Low quality trials will be excluded by conducting sensitivity analysis according to different effect  
195 models. Reporting of sensitivity analysis will be done by producing a summary table.

### 197 **Discussion**

198 The purpose of our systematic review is to give a detailed summary of effectiveness and tolerance  
199 assessment of ginkgo preparations treatment for ADHD. Even though ginkgo preparations have  
200 been used in ADHD, no systematic reviews on the effects and safety have been published. We will  
201 identify subtypes that are particularly useful for specific subgroups according to different types of  
202 ginkgo preparations. We hope that our study will provide reference for physicians, patients and  
203 parents in ADHD clinical practice.

204  
205 **Contributors** The protocol was drafted by SF He, M Wang, XM Gao. The search strategy was  
206 developed and will be run by SF He and JH Si. Selection of the studies will be carried out by SF  
207 He and M Wang. Extraction of data from studies will conducted by SF He and Hong Cui. Analysis  
208 will be performed by SF He and TY Zhang. All authors have read and approved the final protocol.  
209 This review will be updated by SF He and M Wang.

210 **Funding** This study is supported by a project of National Natural Science Foundation of China  
211 (NO.81630106).

212 **Competing interests** None.

213 **Provenance and peer review** Not commissioned; externally peer reviewed.

### 215 **References**

- 216 1. Polanczyk GV, Salum GA, Sugaya LS, Caye A, Rohde LA. Annual research review: A  
217 meta-analysis of the worldwide prevalence of mental disorders in children and adolescents.  
218 Journal of child psychology and psychiatry, and allied disciplines 2015; 56(3): 345-65.



- 1  
2  
3 219 2. Scahill L, Schwab-Stone M. Epidemiology of ADHD in school-age children. *Child and*  
4 220 *adolescent psychiatric clinics of North America* 2000; 9(3): 541-55, vii.
- 5 221 3. Wang TT, Liu KH, Li ZZ, et al. Prevalence of attention deficit/hyperactivity disorder among  
6 222 children and adolescents in China: a systematic review and meta-analysis. *BMC Psychiatry*  
7 223 2017;17(1):1-11.
- 8 224 4. Antshel KM, Zhang-James Y, Faraone SV. The comorbidity of ADHD and autism spectrum  
9 225 disorder. *Expert review of neurotherapeutics* 2013; 13(10): 1117-28.
- 10 226 5. Faraone SV, Ghirardi L, Kuja-Halkola R, Lichtenstein P, Larsson H. The Familial  
11 227 Co-Aggregation of Attention-Deficit/Hyperactivity Disorder and Intellectual Disability: A  
12 228 Register-Based Family Study. *Journal of the American Academy of Child and Adolescent*  
13 229 *Psychiatry* 2017; 56(2): 167-74 e1.
- 14 230 6. Langley K, Fowler T, Ford T, et al. Adolescent clinical outcomes for young people with  
15 231 attention-deficit hyperactivity disorder. *The British journal of psychiatry : the journal of*  
16 232 *mental science* 2010; 196(3): 235-40.
- 17 233 7. Curry AE, Metzger KB, Pfeiffer MR, et al. Motor Vehicle Crash Risk Among Adolescents  
18 234 and Young Adults With Attention-Deficit/Hyperactivity Disorder. *JAMA Pediatr* 2017;  
19 235 171(8):756-763
- 20 236 8. Kafka M. Axis I psychiatric disorders, paraphilic sexual offending and implications for  
21 237 pharmacological treatment. *The Israel journal of psychiatry and related sciences* 2012; 49(4):  
22 238 255-61.
- 23 239 9. Lambie I, Ioane J, Randell I, Seymour F. Offending behaviours of child and adolescent  
24 240 firesetters over a 10-year follow-up. *Journal of child psychology and psychiatry, and allied*  
25 241 *disciplines* 2013; 54(12): 1295-307.
- 26 242 10. Martinez-Raga J, Knecht C, de Alvaro R, et al. Addressing dual diagnosis patients suffering  
27 243 from attention deficit hyperactivity disorders and comorbid substance use disorders: a review  
28 244 of treatment considerations. *Addict Dis Treat* 2013;12:213–30.
- 29 245 11. Noren Selinus E, Molero Y, Lichtenstein P, et al. Subthreshold and threshold attention deficit  
30 246 hyperactivity disorder symptoms in childhood: psychosocial outcomes in adolescence in boys  
31 247 and girls. *Acta psychiatrica Scandinavica* 2016; 134(6): 533-45.
- 32 248 12. Thapar A, Cooper M. Attention deficit hyperactivity disorder. *The Lancet* 2016;  
33 249 387(10024):1240-1250.
- 34 250 13. Molsberger F, Raak C, Witthinrich C. Improvements in sleep and handwriting after  
35 251 complementary medical intervention using acupuncture, applied kinesiology, and respiratory  
36 252 exercises in a nine-year-old ADHD patient on methylphenidate. *Explore*.2014;  
37 253 10(6):398-403.
- 38 254 14. Rothmann K, Hillmer JM, Hosser D. Evaluation of the Musical Concentration Training with  
39 255 Pepe (MusiKo mit Pepe) for children with attention deficits. *Zeitschrift fur Kinder- und*  
40 256 *Jugendpsychiatrie und Psychotherapie* 2014; 42(5): 325-35.
- 41 257 15. Birks J, Grimley Evans J. Ginkgo biloba for cognitive impairment and dementia. *The*  
42 258 *Cochrane database of systematic reviews* 2009; (1): CD003120.
- 43 259 16. Solomon PR, Adams F, Silver A, Zimmer J, DeVaux R. Ginkgo for memory enhancement: a  
44 260 randomized controlled trial. *Jama* 2002; 288(7): 835-40.
- 45 261 17. Hasanzadeh E, Mohammadi MR, Ghanizadeh A, et al. A double-blind placebo controlled trial  
46 262 of Ginkgo biloba added to risperidone in patients with autistic disorders. *Child psychiatry and*

- 1  
2  
3 263 human development 2012; 43(5): 674-82.
- 4 264 18. Gavrilova SI, Preuss UW, Wong JW, et al. Efficacy and safety of Ginkgo biloba extract EGb  
5 265 761 in mild cognitive impairment with neuropsychiatric symptoms: a randomized,  
6 266 placebo-controlled, double-blind, multi-center trial. *International journal of geriatric*  
7 267 *psychiatry* 2014; 29(10): 1087-95.
- 8 268 19. Niederhofer H. Ginkgo biloba treating patients with attention-deficit disorder. *Phytotherapy*  
9 269 *research : PTR* 2010; 24(1): 26-7.
- 10 270 20. van Beek TA, Montoro P. Chemical analysis and quality control of Ginkgo biloba leaves,  
11 271 extracts, and phytopharmaceuticals. *Journal of chromatography A* 2009; 1216(11): 2002-32.
- 12 272 21. Li L, Zhao Y, Du F, et al. Intestinal absorption and presystemic elimination of various  
13 273 chemical constituents present in GBE50 extract, a standardized extract of Ginkgo biloba  
14 274 leaves. *Current drug metabolism* 2012; 13(5): 494-509.
- 15 275 22. Cao J, Yang M, Cao F, et al. Tailor-made hydrophobic deep eutectic solvents for cleaner  
16 276 extraction of polyprenyl acetates from Ginkgo biloba leaves. *Journal of Cleaner Production*  
17 277 2017;(152):399-405.
- 18 278 23. Pilija V, Mirjana R, Brenesel MD, Popovic M, Ivetic V, Trivic S. Inhibitory effect of Ginkgo  
19 279 biloba extract on the tonus of the small intestine and the colon of rabbits. *Molecules* 2010;  
20 280 15(4): 2079-86.
- 21 281 24. Popa-Wagner A, Mitran S, Sivanesan S, Chang E, Buga AM. ROS and brain diseases: the  
22 282 good, the bad, and the ugly. *Oxidative medicine and cellular longevity* 2013; 2013: 963520.
- 23 283 25. Singh SK, Barreto GE, Aliev G, et al. Ginkgo biloba as an Alternative Medicine in the  
24 284 Treatment of Anxiety in Dementia and other Psychiatric Disorders. *Current Drug*  
25 285 *Metabolism* 2017; 18(2):112-119.
- 26 286 26. Nam Y, Shin EJ, Shin SW, et al. YY162 prevents ADHD-like behavioral side effects and  
27 287 cytotoxicity induced by Aroclor1254 via interactive signaling between antioxidant potential,  
28 288 BDNF/TrkB, DAT and NET. *Food and chemical toxicology : an international journal*  
29 289 *published for the British Industrial Biological Research Association* 2014; 65: 280-92.
- 30 290 27. Corominas-Roso M, Ramos-Quiroga JA, Ribases M, et al. Decreased serum levels of  
31 291 brain-derived neurotrophic factor in adults with attention-deficit hyperactivity disorder. *The*  
32 292 *international journal of neuropsychopharmacology* 2013; 16(6): 1267-75.
- 33 293 28. Fentress HM, Klar R, Krueger JJ, et al. Norepinephrine transporter heterozygous knockout  
34 294 mice exhibit altered transport and behavior. *Genes, brain, and behavior* 2013; 12(8): 749-59.
- 35 295 29. Mereu M, Contarini G, Buonaguro EF, et al. Dopamine transporter (DAT) genetic  
36 296 hypofunction in mice produces alterations consistent with ADHD but not schizophrenia or  
37 297 bipolar disorder. *Neuropharmacology* 2017; 121: 179-94.
- 38 298 30. Shamseer L, Moher D, Clarke M, et al. Preferred reporting items for systematic review and  
39 299 meta-analysis protocols (PRISMA-P) 2015: elaboration and explanation. *Bmj* 2015; 349:  
40 300 g7647.
- 41 301 31. Higgins JPT, Altman DG, Sterne JAC. Chapter 8: assessing risk of bias in included studies.  
42 302 In: Higgins JPT, Green S, eds. *Cochrane Handbook for Systematic Reviews of Interventions*  
43 303 *Version 5.1.0, 2011 (updated March 2011)*. The Cochrane Collaboration.  
44 304 <http://www.cochrane-handbook.org>, 2011.
- 45 305 32. Egger M, Davey Smith G, Schneider M, Minder C. Bias in meta-analysis detected by a  
46 306 simple, graphical test. *BMJ* 1997; 315(7109): 629-34.

1  
2  
3 307 33. Higgins JPT, Altman DG. The Cochrane Collaboration. Chapter 9: Analysing data and  
4 308 undertaking meta-analyses. In: Higgins JPT, Green S, eds. Cochrane Handbook for  
5 309 Systematic Reviews of Interventions Version 5.1.0, 2011 (updated March 2011). The  
6 310 Cochrane Collaboration. <http://www.cochrane-handbook.org>, 2011.  
8  
9  
10  
11  
12  
13  
14  
15  
16  
17  
18  
19  
20  
21  
22  
23  
24  
25  
26  
27  
28  
29  
30  
31  
32  
33  
34  
35  
36  
37  
38  
39  
40  
41  
42  
43  
44  
45  
46  
47  
48  
49  
50  
51  
52  
53  
54  
55  
56  
57  
58  
59  
60

For peer review only

## PRISMA-P 2015 Checklist

This checklist has been adapted for use with protocol submissions to *Systematic Reviews* from Table 3 in Moher D et al: Preferred reporting items for systematic review and meta-analysis protocols (PRISMA-P) 2015 statement. *Systematic Reviews* 2015 4:1

| Section/topic                     | #  | Checklist item                                                                                                                                                                                  | Information reported                |                                     | Line number(s) |
|-----------------------------------|----|-------------------------------------------------------------------------------------------------------------------------------------------------------------------------------------------------|-------------------------------------|-------------------------------------|----------------|
|                                   |    |                                                                                                                                                                                                 | Yes                                 | No                                  |                |
| <b>ADMINISTRATIVE INFORMATION</b> |    |                                                                                                                                                                                                 |                                     |                                     |                |
| <b>Title</b>                      |    |                                                                                                                                                                                                 |                                     |                                     |                |
| Identification                    | 1a | Identify the report as a protocol of a systematic review                                                                                                                                        | <input checked="" type="checkbox"/> | <input type="checkbox"/>            | 1              |
| Update                            | 1b | If the protocol is for an update of a previous systematic review, identify as such                                                                                                              | <input type="checkbox"/>            | <input checked="" type="checkbox"/> |                |
| <b>Registration</b>               | 2  | If registered, provide the name of the registry (e.g., PROSPERO) and registration number in the Abstract                                                                                        | <input checked="" type="checkbox"/> | <input type="checkbox"/>            | 28             |
| <b>Authors</b>                    |    |                                                                                                                                                                                                 |                                     |                                     |                |
| Contact                           | 3a | Provide name, institutional affiliation, and e-mail address of all protocol authors; provide physical mailing address of corresponding author                                                   | <input checked="" type="checkbox"/> | <input type="checkbox"/>            | 4-12           |
| Contributions                     | 3b | Describe contributions of protocol authors and identify the guarantor of the review                                                                                                             | <input checked="" type="checkbox"/> | <input type="checkbox"/>            | 205-209        |
| <b>Amendments</b>                 | 4  | If the protocol represents an amendment of a previously completed or published protocol, identify as such and list changes; otherwise, state plan for documenting important protocol amendments | <input type="checkbox"/>            | <input checked="" type="checkbox"/> |                |
| <b>Support</b>                    |    |                                                                                                                                                                                                 |                                     |                                     |                |
| Sources                           | 5a | Indicate sources of financial or other support for the review                                                                                                                                   | <input checked="" type="checkbox"/> | <input type="checkbox"/>            | 210-211        |
| Sponsor                           | 5b | Provide name for the review funder and/or sponsor                                                                                                                                               | <input checked="" type="checkbox"/> | <input type="checkbox"/>            | 210-211        |
| Role of sponsor/funder            | 5c | Describe roles of funder(s), sponsor(s), and/or institution(s), if any, in developing the protocol                                                                                              | <input checked="" type="checkbox"/> | <input type="checkbox"/>            | 210-211        |
| <b>INTRODUCTION</b>               |    |                                                                                                                                                                                                 |                                     |                                     |                |
| <b>Rationale</b>                  | 6  | Describe the rationale for the review in the context of what is already known                                                                                                                   | <input checked="" type="checkbox"/> | <input type="checkbox"/>            | 14-27          |

| Section/topic                             | #   | Checklist item                                                                                                                                                                                                                              | Information reported                |                          | Line number(s) |
|-------------------------------------------|-----|---------------------------------------------------------------------------------------------------------------------------------------------------------------------------------------------------------------------------------------------|-------------------------------------|--------------------------|----------------|
|                                           |     |                                                                                                                                                                                                                                             | Yes                                 | No                       |                |
| <b>Objectives</b>                         | 7   | Provide an explicit statement of the question(s) the review will address with reference to participants, interventions, comparators, and outcomes (PICO)                                                                                    | <input checked="" type="checkbox"/> | <input type="checkbox"/> | 16-17          |
| <b>METHODS</b>                            |     |                                                                                                                                                                                                                                             |                                     |                          |                |
| <b>Eligibility criteria</b>               | 8   | Specify the study characteristics (e.g., PICO, study design, setting, time frame) and report characteristics (e.g., years considered, language, publication status) to be used as criteria for eligibility for the review                   | <input checked="" type="checkbox"/> | <input type="checkbox"/> | 90-112         |
| <b>Information sources</b>                | 9   | Describe all intended information sources (e.g., electronic databases, contact with study authors, trial registers, or other grey literature sources) with planned dates of coverage                                                        | <input checked="" type="checkbox"/> | <input type="checkbox"/> | 120-127        |
| <b>Search strategy</b>                    | 10  | Present draft of search strategy to be used for at least one electronic database, including planned limits, such that it could be repeated                                                                                                  | <input checked="" type="checkbox"/> | <input type="checkbox"/> | 128-143        |
| <b>STUDY RECORDS</b>                      |     |                                                                                                                                                                                                                                             |                                     |                          |                |
| Data management                           | 11a | Describe the mechanism(s) that will be used to manage records and data throughout the review                                                                                                                                                | <input checked="" type="checkbox"/> | <input type="checkbox"/> | 151            |
| Selection process                         | 11b | State the process that will be used for selecting studies (e.g., two independent reviewers) through each phase of the review (i.e., screening, eligibility, and inclusion in meta-analysis)                                                 | <input checked="" type="checkbox"/> | <input type="checkbox"/> | 154-155        |
| Data collection process                   | 11c | Describe planned method of extracting data from reports (e.g., piloting forms, done independently, in duplicate), any processes for obtaining and confirming data from investigators                                                        | <input checked="" type="checkbox"/> | <input type="checkbox"/> | 154-155        |
| <b>Data items</b>                         | 12  | List and define all variables for which data will be sought (e.g., PICO items, funding sources), any pre-planned data assumptions and simplifications                                                                                       | <input checked="" type="checkbox"/> | <input type="checkbox"/> | 156-159        |
| <b>Outcomes and prioritization</b>        | 13  | List and define all outcomes for which data will be sought, including prioritization of main and additional outcomes, with rationale                                                                                                        | <input checked="" type="checkbox"/> | <input type="checkbox"/> | 113-119        |
| <b>Risk of bias in individual studies</b> | 14  | Describe anticipated methods for assessing risk of bias of individual studies, including whether this will be done at the outcome or study level, or both; state how this information will be used in data synthesis                        | <input checked="" type="checkbox"/> | <input type="checkbox"/> | 163-168        |
| <b>DATA</b>                               |     |                                                                                                                                                                                                                                             |                                     |                          |                |
| <b>Synthesis</b>                          | 15a | Describe criteria under which study data will be quantitatively synthesized                                                                                                                                                                 | <input checked="" type="checkbox"/> | <input type="checkbox"/> | 169-174        |
|                                           | 15b | If data are appropriate for quantitative synthesis, describe planned summary measures, methods of handling data, and methods of combining data from studies, including any planned exploration of consistency (e.g., $I^2$ , Kendall's tau) | <input checked="" type="checkbox"/> | <input type="checkbox"/> | 169-185        |
|                                           | 15c | Describe any proposed additional analyses (e.g., sensitivity or subgroup analyses, meta-                                                                                                                                                    | <input checked="" type="checkbox"/> | <input type="checkbox"/> | 186-191        |

| Section/topic                            | #   | Checklist item                                                                                                              | Information reported                |                          | Line number(s) |
|------------------------------------------|-----|-----------------------------------------------------------------------------------------------------------------------------|-------------------------------------|--------------------------|----------------|
|                                          |     |                                                                                                                             | Yes                                 | No                       |                |
|                                          |     | regression)                                                                                                                 |                                     |                          |                |
|                                          | 15d | If quantitative synthesis is not appropriate, describe the type of summary planned                                          | <input checked="" type="checkbox"/> | <input type="checkbox"/> | 174-175        |
| <b>Meta-bias(es)</b>                     | 16  | Specify any planned assessment of meta-bias(es) (e.g., publication bias across studies, selective reporting within studies) | <input checked="" type="checkbox"/> | <input type="checkbox"/> | 179-181        |
| <b>Confidence in cumulative evidence</b> | 17  | Describe how the strength of the body of evidence will be assessed (e.g., GRADE)                                            | <input checked="" type="checkbox"/> | <input type="checkbox"/> | 159            |

# BMJ Open

## Efficacy and Safety of Ginkgo Preparations for Attention Deficit Hyperactivity Disorder: A Systematic Review Protocol

|                                 |                                                                                                                                                                                                                                                                                                                                                                                                                                                                                                                                                                                                                                   |
|---------------------------------|-----------------------------------------------------------------------------------------------------------------------------------------------------------------------------------------------------------------------------------------------------------------------------------------------------------------------------------------------------------------------------------------------------------------------------------------------------------------------------------------------------------------------------------------------------------------------------------------------------------------------------------|
| Journal:                        | <i>BMJ Open</i>                                                                                                                                                                                                                                                                                                                                                                                                                                                                                                                                                                                                                   |
| Manuscript ID                   | bmjopen-2017-020434.R1                                                                                                                                                                                                                                                                                                                                                                                                                                                                                                                                                                                                            |
| Article Type:                   | Protocol                                                                                                                                                                                                                                                                                                                                                                                                                                                                                                                                                                                                                          |
| Date Submitted by the Author:   | 20-Dec-2017                                                                                                                                                                                                                                                                                                                                                                                                                                                                                                                                                                                                                       |
| Complete List of Authors:       | He, Sufei; Tianjin University of Traditional Chinese Medicine, Collaborative Innovation Center of Modern Chinese Medicine<br>Wang, Miao; Tianjin University of Traditional Chinese Medicine,, College of Chinese Medicine,<br>Si, Jinhua; Tianjin University of Traditional Chinese Medicine, Library<br>Zhang, Tianyi; Tianjin University of Traditional Chinese Medicine, Second Affiliated Hospital<br>Cui, Hong; Tianjin University of Traditional Chinese Medicine, First Affiliated Hospital<br>Gao, Xiumei; Tianjin University of Traditional Chinese Medicine, Collaborative Innovation Center of Modern Chinese Medicine |
| <b>Primary Subject Heading</b>: | Complementary medicine                                                                                                                                                                                                                                                                                                                                                                                                                                                                                                                                                                                                            |
| Secondary Subject Heading:      | Paediatrics, Complementary medicine                                                                                                                                                                                                                                                                                                                                                                                                                                                                                                                                                                                               |
| Keywords:                       | Ginkgo Preparations, Attention Deficit Hyperactivity Disorder, Efficacy, Safety                                                                                                                                                                                                                                                                                                                                                                                                                                                                                                                                                   |
|                                 |                                                                                                                                                                                                                                                                                                                                                                                                                                                                                                                                                                                                                                   |

SCHOLARONE™  
Manuscripts



1 Efficacy and Safety of Ginkgo Preparations for Attention Deficit Hyperactivity Disorder: A  
2 Systematic Review Protocol

3 Sufei He<sup>1#</sup>, Miao Wang<sup>2#</sup>, Jinhua Si<sup>3</sup>, Tianyi Zhang<sup>4</sup>, Hong Cui<sup>5</sup>, Xiumei Gao<sup>1\*</sup>

4 1. Collaborative Innovation Center of Modern Chinese Medicine, Tianjin University of Traditional  
5 Chinese Medicine, Tianjin 300193, P.R. China.

6 2. College of Chinese Medicine, Tianjin University of Traditional Chinese Medicine, Tianjin  
7 300193, P.R. China.

8 3. Library, Tianjin University of Traditional Chinese Medicine, Tianjin 300193, P.R. China.

9 4. Second Affiliated Hospital, Tianjin University of Traditional Chinese Medicine, Tianjin 300193,  
10 P.R. China.

11 5. First Affiliated Hospital, Tianjin University of Traditional Chinese Medicine, Tianjin 300193,  
12 P.R. China.

13 # Authors contributed equally.

14 \* Correspondence to Prof. Xiumei Gao, gaoxiumei1984@hotmail.com.

15 **Abstract**

16 **Introduction** Attention Deficit Hyperactivity Disorder (ADHD) is one of the most commonly  
17 diagnosed and treated childhood psychiatric disorders. The analogous diagnosis adopted in Europe  
18 is hyperkinetic disorder, which is defined in the World Health Organization's (WHO's)  
19 International Classification of Diseases (10th edition; ICD-10). Hyperkinetic disorder includes  
20 more severe conditions. Ginkgo preparations are used in the treatment of ADHD. The present  
21 study will assess the efficacy and safety of ginkgo preparations in the treatment of ADHD in the  
22 currently published literature.

23 **Materials and methods** All prospective randomized controlled trials (RCTs) will be included in  
24 this systematic review. Patients diagnosed with ADHD according to American Psychiatric  
25 Association's Diagnostic and Statistical Manual of Mental Disorders 4th edition (DSM-IV),  
26 Diagnostic and Statistical Manual of Mental Disorders, Fifth Edition (DSM-5), ICD-10, or  
27 Chinese Classification and Diagnosis of Mental Diseases-3rd edition (CMDD) will be included. A  
28 comprehensive search for randomized controlled trials to evaluate the effectiveness and tolerance  
29 of ginkgo preparations will be performed. The primary outcomes are the ADHD rating Scale-IV  
30 (ADHD-RS-IV) and Revised Conners' Parent Rating Scale (CPRS-R). The secondary outcomes  
31 are quality of life evaluated by the KINDL scale, adverse effects/events, Conners' Teacher Rating  
32 Scale (CTRS), Strengths and Weaknesses of ADHD Symptoms and Normal Behaviour (SWAN)  
33 Scale, and Fremdbeurteilungsbogen für Hyperkinetische Störungen (FBB-HKS). Exclusion  
34 criteria are the following: 1) Case reports; not randomized trial; non-comparative studies, 2)  
35 Patients who were not diagnosed based on DSM-IV, DSM-5, ICD-10 or CMDD. The following  
36 databases will be searched from their inception until Jan 2018: Medline, Embase, the Cochrane  
37 Central Register of Controlled Trials, Web of Science, China Biology Medicine Disc, China  
38 National Knowledge Infrastructure Database, Wanfang Database and Chinese Scientific Journals  
39 Database. Two authors will independently perform the study selection, extract the data, and assess  
40 the study quality and risk of bias.

1  
2  
3 41 **Ethics and dissemination** This systematic review does not require ethics approval. It will be  
4 42 published in a peer-reviewed journal.

5 43 **PROSPERO registration number** CRD42017077190  
6  
7 44

#### 8 45 **Strengths and limitations of this study**

9 46 This study will evaluate the safety of ginkgo preparations as a sole or adjunct agent for ADHD  
10 47 treatment.

11 48 Our review will be useful to clinicians, patients and parents who use ginkgo preparations for  
12 49 ADHD treatment.

13 50 Clinical heterogeneity may exist for different dosage forms of ginkgo preparations, doses,  
14 51 durations and combined treatments.

15 52 There may be a language bias with the limitation of English and Chinese studies.  
16 53

#### 17 54 **Introduction**

##### 18 55 **Description of the condition of ADHD treatment**

19 56 The prevalence of attention deficit hyperactivity disorder (ADHD) in children and adolescents is  
20 57 as high as 3.4% in the general population<sup>[1]</sup>, and it is one of the most commonly diagnosed and  
21 58 treated childhood psychiatric disorders<sup>[2]</sup>. The diagnosis rate rises to 6.26% in China<sup>[3]</sup>. The  
22 59 analogous diagnosis adopted in Europe is hyperkinetic disorder, which is defined in the ICD-10.  
23 60 Hyperkinetic disorder includes more severe conditions.<sup>[4]</sup> ADHD is a childhood-onset  
24 61 neurodevelopmental disorder that may persist into adolescence and adulthood, and it has a high  
25 62 societal burden. The primary symptoms consist of inattention and hyperactivity/impulsivity that  
26 63 are often accompanied by other neurodevelopment disorders, such as autism spectrum disorder<sup>[5]</sup>  
27 64 and intellectual disability<sup>[6]</sup>. A large proportion of adolescents and adults with ADHD exhibit  
28 65 antisocial behaviour and criminal activities, including conduct disorder, oppositional defiant  
29 66 disorder<sup>[7]</sup>, risk of crashing<sup>[8]</sup>, sexual offenses<sup>[9]</sup> and arson<sup>[10]</sup>, especially among arrested, convicted  
30 67 and imprisoned adolescents and adults. Therefore, ADHD has been increasingly considered a  
31 68 severe social issue.

32 69 Stimulants are the first-line medications for ADHD treatment. Patients with ADHD manage their  
33 70 symptoms by using stimulants. However, the risk of substance abuse may increase in this patient  
34 71 population, and substance use disorder (SUD) is one of the most common comorbid psychiatric  
35 72 disorders in adolescent and adult patients<sup>[11-12]</sup>. The related adverse side-effects of stimulants  
36 73 include cardiovascular events, insomnia, appetite loss, hypoevolutism, gastrointestinal symptoms,  
37 74 and tics<sup>[13]</sup>. Complementary or alternative medical treatments for ADHD, such as plant-based  
38 75 medications, acupuncture<sup>[14]</sup> and music therapy<sup>[15]</sup>, are considered because of the side effects,  
39 76 abuse and misuse of conventional pharmacological treatments. It is also important to evaluate the  
40 77 efficacy and safety of plant-based medications and acupuncture.

##### 41 78 **Description of the intervention**

42 79 Ginkgo biloba preparations, including tablets, granules, pills, injection distillates, oral solutions,  
43 80 extracts, and dropping pills, are approved for commercial marketing. Egb 761®, Ginaton®,  
44 81 Tebonin®, Rokan®, Tanakan®, Ginkobil®, GBE50®, and Kaveri® are approved in the USA and  
45 82 Europe. Ginkgo Biloba Leaves Dispersible Tablet, Ginkgo Leaf Capsule, Ginkgo Leaves Soft Gel  
46 83 Capsule, Ginkgo Damole Injection, YinxingDamo, Ginkgo Biloba Granule, YinxingGuttate  
47 84 Dropping Pill, Ginkgo Biloba Extract Injection, Ginkgo Distillate, Diterpene Ginkgolides

85 Meglumine Injection, Ginkgolide Injection, Ginkgo Biloba Leaves Extract Oral Solution, Ginkgo  
86 Leaf Extract, Armillariella Mellea Powders Oral Solution, YinXingGuttate Dropping Pills, and  
87 Shuxuening Zhusheye are approved by the China Food and Drug Administration (CFDA). Ginkgo  
88 preparations are among the best-selling botanical dietary supplements worldwide. Clinical  
89 evidence indicates that Ginkgo biloba is safe and exhibits no excess side effects compared with  
90 placebo for cognitive impairment and dementia<sup>[16]</sup>. However, the evidence of efficacy is  
91 equivocal.<sup>[17]</sup>

92 Ginkgo preparations alleviate the conditions such as autism<sup>[18]</sup>, depression<sup>[19]</sup>, and  
93 neuropsychiatric symptoms such as anxiety<sup>[20]</sup>. Ginkgo preparations may affect the behavioral and  
94 cognitive aspects of ADHD. The predominant behavioral effects are calming and improved  
95 frustration tolerance. Ginkgo biloba induces willful cognition, discriminant attention and  
96 decreases irritability<sup>[21]</sup>.

### 97 **How the intervention might work**

98 Components isolated from ginkgo biloba contain terpene trilactones, flavonol glycosides,  
99 isoflavonoids, biflavones, proanthocyanidins, alkylphenols, carboxylic acids,  
100 4-O-Methylpyridoxine and polyphenols<sup>[22-24]</sup>. Preclinical evidence indicates that ginkgo flavonol  
101 glycosides are predominantly responsible for the antioxidant activity<sup>[25]</sup>. The antioxidant activity  
102 of ginkgo flavonol glycosides reduce reactive oxygen species (ROS)-induced oxidative stress,  
103 which contributes to neurodevelopmental disorders by causing membrane damage, changes in  
104 protein structure and function, lipid denaturation and DNA damage<sup>[26]</sup>. Terpene trilactones are  
105 associated with neuroprotective properties<sup>[27]</sup>. Investigations have demonstrated that terpene  
106 trilactones attenuate the decrease in brain-derived neurotropic factor (BDNF), norepinephrine  
107 transporter (NET) and dopamine transporter (DAT)<sup>[28]</sup>, which are negatively related to ADHD  
108 pathogenesis<sup>[29-31]</sup>.

109 No comprehensive quantitative reviews of treatments of ADHD with ginkgo preparations have  
110 been performed. Therefore, it is important to investigate the current evidence of the efficacy and  
111 tolerance of ginkgo preparations therapy for ADHD.

## 112 **Materials and methods**

### 113 **Registration information**

114 This systematic review protocol adheres to the preferred reporting items for systematic review and  
115 meta-analysis protocols (PRISMA-P) 2015<sup>[32]</sup>. The protocol was registered on PROSPERO, and  
116 the registration number is CRD42017077190.

### 117 **Inclusion criteria**

#### 118 ***Types of study***

119 All prospective randomized controlled trials (RCTs) will be included in this systematic review, but  
120 trials without detailed data will be excluded. Abstracts with sufficient outcome data will be  
121 included. Cross-over trials will be included with the two phases of data if there is sufficient  
122 washout and return to baseline.

#### 123 ***Type of participants***

124 Patients with ADHD or hyperkinetic disorder who were diagnosed based on American Psychiatric  
125 Association's Diagnostic and Statistical Manual of Mental Disorders 4th edition (DSM-IV);  
126 Diagnostic and Statistical Manual of Mental Disorders, Fifth Edition (DSM-5); WHO's  
127 International Classification of Diseases (10th edition; ICD-10); or Chinese Classification and  
128

1  
2  
3 129 Diagnosis of Mental Diseases-3rd edition (CMDD) will be included. There will be no limitations  
4 130 on age or sex.

5 131 ***Types of interventions and controls***

6 132 Randomized studies of the ginkgo preparations, as the sole treatment or as an adjunct to other  
7 133 treatments, that were used in the intervention and control groups in the same manner will be  
8 134 included. Ginkgo preparations include Egb 761®, Ginaton®, Tebonin®, Rokan®, Tanakan®,  
9 135 Ginkobil®, GBE50®, and Kaveri®, Ginkgo Biloba Leaves Dispersible Tablet, Ginkgo Leaf  
10 136 Capsule, Ginkgo Leaves Soft Gel Capsule, Ginkgo Damole Injection, YinxingDamo, Ginkgo  
11 137 Biloba Granule, YinxingGuttate Dropping Pill, Ginkgo Biloba Extract Injection, Ginkgo Distillate,  
12 138 Diterpene Ginkgolides Meglumine Injection, Ginkgolide Injection, Ginkgo Biloba Leaves Extract  
13 139 Oral Solution, Ginkgo Leaf Extract, Armillariella Mellea Powders Oral Solution, YinxingGuttate  
14 140 Dropping Pills, and Shuxuening Zhushuye. The control groups will include psychostimulant drug  
15 141 use, placebo use, psychotherapy and no treatment.

16 142 **Outcomes measures**

17 143 ***Primary outcomes:***

18 144 The ADHD rating Scale-IV (ADHD-RS-IV).

19 145 The Revised Conners' Parent Rating Scale (CPRS-R).<sup>[33]</sup>

20 146 ***Secondary outcomes:***

21 147 Quality of life on the KINDL scale.<sup>[34]</sup>

22 148 Adverse effects/events.

23 149 Conners' Teacher Rating Scale (CTRS).<sup>[35]</sup>

24 150 Strengths and Weaknesses of ADHD Symptoms and Normal Behaviour (SWAN) Scale.<sup>[36]</sup>

25 151 Fremdbeurteilungsbogen für Hyperkinetische Störungen (FBB-HKS).<sup>[37]</sup>

26 152 **Exclusion criteria**

27 153 1) Case reports; not randomized trial; non-comparative studies.

28 154 2) Patients who were not diagnosed based on DSM-IV, DSM-5, ICD-10 or CMDD.

29 155 **Data sources**

30 156 We will search the following electronic bibliographic databases: Medline, Embase, the Cochrane  
31 157 Central Register of Controlled Trials (CENTRAL), Web of Science (science and social science  
32 158 citation index), China Biology Medicine Disc (CBMdisc), China National Knowledge  
33 159 Infrastructure Database (CNKI), Wanfang Database and the Chinese Scientific Journals Database  
34 160 (VIP). The search strategy will include terms relating to or describing the patients and intervention.  
35 161 The terms will be combined with the Cochrane MEDLINE filter for controlled trials of  
36 162 interventions.

37 163 **Search strategies**

38 164 A search of Medline will be performed using the following terms: (ginkgo biloba OR ginkgolides  
39 165 OR bilobalides OR ginkgo biloba leaves dispersible tablet OR Ginkgo Leaf Capsule OR Ginkgo  
40 166 Leaves Soft gel Capsule OR Ginkgo damole Injection OR Yinxing damo OR Ginkgo biloba  
41 167 granule OR Yinxing Guttate Dropping Pill OR Ginkgo biloba extract injection OR ginkgo  
42 168 distillate OR Diterpene Ginkgolides Meglumine Injection OR Ginkgolide Injection OR Ginkgo  
43 169 Biloba Leaves Extract Oral Solution OR Ginkgo Leaf Extract OR Armillariella Mellea Powders  
44 170 Oral Solution OR Yinxing Guttate Dropping Pills OR Egb 761 OR Egb761 OR Ginaton® OR  
45 171 Tebonin forte OR Tanakan® OR Rökan® OR Ginkobil® OR GBE50 OR Kaveri® OR  
46 172 Shuxuening Zhushuye) AND (attention deficit hyperactivity disorder OR ADHD OR hyperkinetic

173 disorders). The strategies will be modified for Embase, Cochrane, Web of Science, CBM, CNKI,  
174 Wanfang and VIP.

175 The search terms will be adapted for use with the above bibliographic databases in combination  
176 with database-specific filters for controlled trials, when available. Language is limited with  
177 English and Chinese. The databases will be searched from their inception until Jan 2018.

### 178 **Data collection and analysis**

#### 179 ***Selection of studies***

180 Two authors (SF He and M WANG) will select studies by assessing the titles and abstracts after  
181 duplication removal. The full text will be further reviewed for inclusion. Randomized controlled  
182 trials that investigated the efficacy and safety of meditation therapy in patients diagnosed with  
183 ADHD will be selected. Study selection will be documented and summarized in a  
184 PRISMA-compliant flow chart (Figure 1)(<http://www.prisma-statement.org>).

#### 185 ***Data extraction***

186 Two authors (SF He and H Cui) will independently perform data extraction and risk of bias  
187 assessments using a predefined data extraction form. The first author, publication year, study  
188 design, intervention, dosage, diagnostic criteria, disease duration, number of participants  
189 allocation, dropout, duration, outcome, outcome results (e.g., ADHD-RS-IV, CPRS-R, quality of  
190 life on the KINDL scale and adverse effects/events, et al) and follow-up periods will be collected.  
191 We will use GRADEpro software to create a summary of findings table.

192 Any disagreement between the two authors will be resolved by discussion, and XM Gao will make  
193 the final decision. TY Zhang will contact the authors for additional information by mail when the  
194 data are insufficient.

#### 195 ***Assessment of study quality and risk of bias***

196 The quality of the studies for each outcome will be assessed using the Grading of  
197 Recommendations Assessment, Development and Evaluation classification system (GRADE),  
198 which will be judged by limitations in the design and implementation, imprecision, inconsistency,  
199 indirectness and reporting bias. Evidence quality will be classified into four levels: high, moderate,  
200 low or very low.

201 We will assess the risk of bias of the included studies using a risk of bias assessment tool  
202 according to the guidelines of the Cochrane Handbook<sup>[38]</sup>. SF He and M Wang will classify the  
203 risk of bias in the included studies as low risk, unclear risk and high risk. The following factors  
204 will be assessed: random sequence generation, allocation sequence concealment, blinding of  
205 participants and personnel, blinding of outcome assessment, incomplete outcome data and  
206 selective outcome reporting.

#### 207 ***Data synthesis and analysis***

208 A meta-analysis will be performed using a random-effect model or fixed-effect model for the  
209 identified studies. We will use Review Manager 5.3.5 software (RevMan 5.3.5) to combine the  
210 data from the trials. The mean differences (MD) or standardized mean differences (SMD) for  
211 continuous outcomes and risk ratio (RR) for dichotomous outcomes with 95% confidence  
212 intervals (95% CIs) will be pooled in RevMan 5.3.5. A systematic narrative synthesis will be  
213 performed to summarize the relationship of the included studies when quantitative synthesis is not  
214 appropriate.

#### 215 ***Dealing with missing data***

216 We will attempt to collect data from original study investigators if possible for missing or



1  
2  
3 217 incomplete data. We will consider estimating data if we cannot obtain the original source.

4 218 **Assessment of reporting biases**

5 219 We will detect reporting biases using funnel plots if more than 10 studies are included. An  
6 220 asymmetry test will be performed using Egger's method<sup>[39]</sup>.

7 221 **Assessment of heterogeneity**

8 222 Heterogeneity will be tested using the chi-squared ( $\chi^2$ , or Chi2) test for the P value.  $I^2$  will be  
9 223 calculated. An  $I^2$  value >50% will indicate substantial heterogeneity<sup>[40]</sup>. We will perform subgroup  
10 224 analyses or narrative descriptions based on the situation (e.g., lack of included trials).

11 225 **Subgroup analysis and investigation of heterogeneity**

12 226 Subgroup analysis will be performed to explore the source of heterogeneity by the different dosage  
13 227 forms of ginkgo preparations, dose, follow-up period and type of control.

14 228 **Sensitivity analysis**

15 229 Low-quality trials will be excluded from sensitivity analyses according to the different effect  
16 230 models. A summary table will report the results of the sensitivity analyses.

17 231

18 232 **Discussion**

19 233 Our systematic review will provide a detailed summary of the efficacy and tolerance of ginkgo  
20 234 preparations for the treatment of ADHD. Ginkgo preparations are used in ADHD treatment, but no  
21 235 systematic reviews on the efficacy or safety have been published. We will identify ginkgo  
22 236 preparation subtypes that are particularly useful in specific subgroups. We hope that our study will  
23 237 provide a reference for physicians, patients and parents in ADHD clinical practice.

24 238

25 239 **Contributors** SF He, M Wang, and XM Gao drafted the protocol. SF He and JH Si developed and  
26 240 will perform the search strategy. SF He and M Wang will select the studies. SF He and Hong Cui  
27 241 will extract data from selected studies. SF He and TY Zhang will perform the analyses. All of the  
28 242 authors read and approved the final protocol. SF He and M Wang will update this review.

29 243 **Funding** This study is supported by the National Natural Science Foundation of China (No.  
30 244 81630106).

31 245 **Competing interests** None.

32 246 **Provenance and peer review** Not commissioned; externally peer reviewed.

33 247 **Ethics and dissemination** This systematic review does not require ethics approval. It will be  
34 248 published in a peer-reviewed journal.

35 249 **References**

- 36 250 1. Polanczyk GV, Salum GA, Sugaya LS, et al. Annual research review: A meta-analysis of the  
37 251 worldwide prevalence of mental disorders in children and adolescents. *Journal of child*  
38 252 *psychology and psychiatry, and allied disciplines* 2015; 56(3): 345-65.
- 39 253 2. Scahill L, Schwab-Stone M. Epidemiology of ADHD in school-age children. *Child and*  
40 254 *adolescent psychiatric clinics of North America* 2000; 9(3): 541-55, vii.
- 41 255 3. Wang TT, Liu KH, Li ZZ, et al. Prevalence of attention deficit/hyperactivity disorder among  
42 256 children and adolescents in China: a systematic review and meta-analysis. *BMC Psychiatry*  
43 257 2017;17(1):1-11.
- 44 258 4. Ford T, Goodman R, Meltzer H. The British Child and Adolescent Mental Health Survey  
45 259 1999: the prevalence of DSM-IV disorders. *J Am Acad Child Adolesc Psychiatry* 2003; 42:  
46 260 1203-11.

- 1  
2  
3 261 5. Antshel KM, Zhang-James Y, Faraone SV. The comorbidity of ADHD and autism spectrum  
4 262 disorder. *Expert review of neurotherapeutics* 2013; 13(10): 1117-28.
- 5 263 6. Faraone SV, Ghirardi L, Kuja-Halkola R, et al. The Familial Co-Aggregation of  
6 264 Attention-Deficit/Hyperactivity Disorder and Intellectual Disability: A Register-Based  
7 265 Family Study. *Journal of the American Academy of Child and Adolescent Psychiatry* 2017;  
8 266 56(2): 167-74 e1.
- 9  
10 267 7. Langley K, Fowler T, Ford T, et al. Adolescent clinical outcomes for young people with  
11 268 attention-deficit hyperactivity disorder. *The British journal of psychiatry : the journal of*  
12 269 *mental science* 2010; 196(3): 235-40.
- 13  
14 270 8. Curry AE, Metzger KB, Pfeiffer MR, et al. Motor Vehicle Crash Risk Among Adolescents  
15 271 and Young Adults With Attention-Deficit/Hyperactivity Disorder. *JAMA Pediatr* 2017;  
16 272 171(8):756-763
- 17 273 9. Kafka M. Axis I psychiatric disorders, paraphilic sexual offending and implications for  
18 274 pharmacological treatment. *The Israel journal of psychiatry and related sciences* 2012; 49(4):  
19 275 255-61.
- 20 276 10. Lambie I, Ioane J, Randell I, et al. Offending behaviours of child and adolescent firesetters  
21 277 over a 10-year follow-up. *Journal of child psychology and psychiatry, and allied disciplines*  
22 278 2013; 54(12): 1295-307.
- 23 279 11. Martinez-Raga J, Knecht C, de Alvaro R, et al. Addressing dual diagnosis patients suffering  
24 280 from attention deficit hyperactivity disorders and comorbid substance use disorders: a review  
25 281 of treatment considerations. *Addict Dis Treat* 2013;12:213–30.
- 26 282 12. Noren Selinus E, Molero Y, Lichtenstein P, et al. Subthreshold and threshold attention deficit  
27 283 hyperactivity disorder symptoms in childhood: psychosocial outcomes in adolescence in boys  
28 284 and girls. *Acta psychiatrica Scandinavica* 2016; 134(6): 533-45.
- 29 285 13. Thapar A, Cooper M. Attention deficit hyperactivity disorder. *The Lancet* 2016;  
30 286 387(10024):1240-1250.
- 31 287 14. Molsberger F, Raak C, Witthinrich C. Improvements in sleep and handwriting after  
32 288 complementary medical intervention using acupuncture, applied kinesiology, and respiratory  
33 289 exercises in a nine-year-old ADHD patient on methylphenidate. *Explore*.2014;  
34 290 10(6):398-403.
- 35 291 15. Rothmann K, Hillmer JM, Hosser D. Evaluation of the Musical Concentration Training with  
36 292 Pepe (MusiKo mit Pepe) for children with attention deficits. *Zeitschrift fur Kinder- und*  
37 293 *Jugendpsychiatrie und Psychotherapie* 2014; 42(5): 325-35.
- 38 294 16. Birks J, Grimley Evans J. Ginkgo biloba for cognitive impairment and dementia. *The*  
39 295 *Cochrane database of systematic reviews* 2009; (1): CD003120.
- 40 296 17. Tan MS, Yu JT, Tan CC, et al. Efficacy and adverse effects of ginkgo biloba for cognitive  
41 297 impairment and dementia: a systematic review and meta-analysis. *Journal of Alzheimer's*  
42 298 *Disease* 2015; 2015;43(2):589-603.
- 43 299 18. Solomon PR, Adams F, Silver A, et al. Ginkgo for memory enhancement: a randomized  
44 300 controlled trial. *Jama* 2002; 288(7): 835-40.
- 45 301 19. Hasanzadeh E, Mohammadi MR, Ghanizadeh A, et al. A double-blind placebo controlled trial  
46 302 of Ginkgo biloba added to risperidone in patients with autistic disorders. *Child psychiatry and*  
47 303 *human development* 2012; 43(5): 674-82.
- 48 304 20. Gavrilova SI, Preuss UW, Wong JW, et al. Efficacy and safety of Ginkgo biloba extract EGb



- 1  
2  
3 305 761 in mild cognitive impairment with neuropsychiatric symptoms: a randomized,  
4 306 placebo-controlled, double-blind, multi-center trial. *International journal of geriatric*  
5 307 *psychiatry* 2014; 29(10): 1087-95.
- 6 308 21. Niederhofer H. Ginkgo biloba treating patients with attention-deficit disorder. *Phytotherapy*  
7 309 *research : PTR* 2010; 24(1): 26-7.
- 8 310 22. van Beek TA, Montoro P. Chemical analysis and quality control of Ginkgo biloba leaves,  
9 311 extracts, and phytopharmaceuticals. *Journal of chromatography A* 2009; 1216(11): 2002-32.
- 10 312 23. Li L, Zhao Y, Du F, et al. Intestinal absorption and presystemic elimination of various  
11 313 chemical constituents present in GBE50 extract, a standardized extract of Ginkgo biloba  
12 314 leaves. *Current drug metabolism* 2012; 13(5): 494-509.
- 13 315 24. Cao J, Yang M, Cao F, et al. Tailor-made hydrophobic deep eutectic solvents for cleaner  
14 316 extraction of polyprenyl acetates from Ginkgo biloba leaves. *Journal of Cleaner Production*  
15 317 2017;(152):399-405.
- 16 318 25. Pilija V, Mirjana R, Brenesel MD, et al. Inhibitory effect of Ginkgo biloba extract on the  
17 319 tonus of the small intestine and the colon of rabbits. *Molecules* 2010; 15(4): 2079-86.
- 18 320 26. Popa-Wagner A, Mitran S, Sivanesan S, Chang E, Buga AM. ROS and brain diseases: the  
19 321 good, the bad, and the ugly. *Oxidative medicine and cellular longevity* 2013; 2013: 963520.
- 20 322 27. Singh SK, Barreto GE, Aliev G, et al. Ginkgo biloba as an Alternative Medicine in the  
21 323 Treatment of Anxiety in Dementia and other Psychiatric Disorders. *Current Drug*  
22 324 *Metabolism* 2017; 18(2):112-119.
- 23 325 28. Nam Y, Shin EJ, Shin SW, et al. YY162 prevents ADHD-like behavioral side effects and  
24 326 cytotoxicity induced by Aroclor1254 via interactive signaling between antioxidant potential,  
25 327 BDNF/TrkB, DAT and NET. *Food and chemical toxicology : an international journal*  
26 328 *published for the British Industrial Biological Research Association* 2014; 65: 280-92.
- 27 329 29. Corominas-Roso M, Ramos-Quiroga JA, Ribases M, et al. Decreased serum levels of  
28 330 brain-derived neurotrophic factor in adults with attention-deficit hyperactivity disorder. *The*  
29 331 *international journal of neuropsychopharmacology* 2013; 16(6): 1267-75.
- 30 332 30. Fentress HM, Klar R, Krueger JJ, et al. Norepinephrine transporter heterozygous knockout  
31 333 mice exhibit altered transport and behavior. *Genes, brain, and behavior* 2013; 12(8): 749-59.
- 32 334 31. Mereu M, Contarini G, Buonaguro EF, et al. Dopamine transporter (DAT) genetic  
33 335 hypofunction in mice produces alterations consistent with ADHD but not schizophrenia or  
34 336 bipolar disorder. *Neuropharmacology* 2017; 121: 179-94.
- 35 337 32. Shamseer L, Moher D, Clarke M, et al. Preferred reporting items for systematic review and  
36 338 meta-analysis protocols (PRISMA-P) 2015: elaboration and explanation. *Bmj* 2015; 349:  
37 339 g7647.
- 38 340 33. C. Keith Conners, Gill Sitarenios, James D. A. Parker, et al. The revised Conners" Parent  
39 341 Rating Scale (CPRS-R): factor structure, reliability, and criterion validity[J].*Journal of*  
40 342 *Abnormal Child Psychology*.1998; 26(4):257-268.
- 41 343 34. Ravens-Sieberer, U., & Bullinger, M. Assessing health related quality of life in chronically ill  
42 344 children with the German KINDL: First psychometric and content analytical results. *Quality*  
43 345 *of Life Research*, 1998;7;399-407.
- 44 346 35. Conners CK, Sitarenios G, Parker JD. Revision and restandardization of the Conners Teacher  
45 347 Rating Scale (CTRS-R): factor structure, reliability, and criterion validity.1998; 26(4):279-91.
- 46 348 36. Lai KY, Leung PW, Luk ES, et al. Validation of the Chinese strengths and weaknesses of

- 1  
2  
3 349 ADHD-symptoms and normal-behaviors questionnaire in Hong Kong. *Journal of Attention*  
4 350 *Disorders* 2013; 17(3):194-202.
- 5 351 37. Brühl B, Döpfner M, Lehmkuhl G. Der Fremdbeurteilungsbogen für hyperkinetische  
6 352 Störungen (FBB-HKS)—Prävalenz hyperkinetischer Störungen im Elternurteil und  
7 353 psychometrische Kriterien. *Kindheit und Entwicklung* . 2000;9:116–126.
- 8 354 38. Higgins JPT, Altman DG, Sterne JAC. Chapter 8: assessing risk of bias in included studies.  
9 355 In: Higgins JPT, Green S, eds. *Cochrane Handbook for Systematic Reviews of Interventions*  
10 356 *Version 5.1.0, 2011 (updated March 2011)*. The Cochrane Collaboration.  
11 357 <http://www.cochrane-handbook.org>, 2011.
- 12 358 39. Egger M, Davey Smith G, Schneider M, Minder C. Bias in meta-analysis detected by a  
13 359 simple, graphical test. *BMJ* 1997; 315(7109): 629-34.
- 14 360 40. Higgins JPT, Altman DG. The Cochrane Collaboration. Chapter 9: Analysing data and  
15 361 undertaking meta-analyses. In: Higgins JPT, Green S, eds. *Cochrane Handbook for*  
16 362 *Systematic Reviews of Interventions Version 5.1.0, 2011 (updated March 2011)*. The  
17 363 Cochrane Collaboration. <http://www.cochrane-handbook.org>, 2011.
- 18 364 Figure 1 PRISMA flow diagram of the study searching and screening.  
19 365  
20  
21  
22  
23  
24  
25  
26  
27  
28  
29  
30  
31  
32  
33  
34  
35  
36  
37  
38  
39  
40  
41  
42  
43  
44  
45  
46  
47  
48  
49  
50  
51  
52  
53  
54  
55  
56  
57  
58  
59  
60

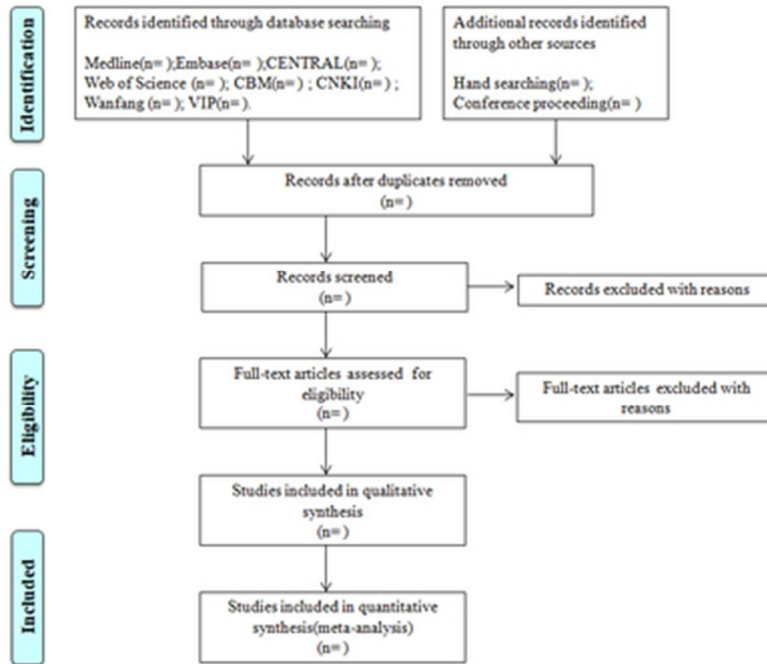

PRISMA flow diagram of the study searching and screening studies

16x14mm (600 x 600 DPI)

## PRISMA-P 2015 Checklist

This checklist has been adapted for use with protocol submissions to *Systematic Reviews* from Table 3 in Moher D et al: Preferred reporting items for systematic review and meta-analysis protocols (PRISMA-P) 2015 statement. *Systematic Reviews* 2015 4:1

| Section/topic                     | #  | Checklist item                                                                                                                                                                                  | Information reported                |                                     | Line number(s) |
|-----------------------------------|----|-------------------------------------------------------------------------------------------------------------------------------------------------------------------------------------------------|-------------------------------------|-------------------------------------|----------------|
|                                   |    |                                                                                                                                                                                                 | Yes                                 | No                                  |                |
| <b>ADMINISTRATIVE INFORMATION</b> |    |                                                                                                                                                                                                 |                                     |                                     |                |
| <b>Title</b>                      |    |                                                                                                                                                                                                 |                                     |                                     |                |
| Identification                    | 1a | Identify the report as a protocol of a systematic review                                                                                                                                        | <input checked="" type="checkbox"/> | <input type="checkbox"/>            | 1-2            |
| Update                            | 1b | If the protocol is for an update of a previous systematic review, identify as such                                                                                                              | <input type="checkbox"/>            | <input checked="" type="checkbox"/> |                |
| <b>Registration</b>               | 2  | If registered, provide the name of the registry (e.g., PROSPERO) and registration number in the Abstract                                                                                        | <input checked="" type="checkbox"/> | <input type="checkbox"/>            | 43             |
| <b>Authors</b>                    |    |                                                                                                                                                                                                 |                                     |                                     |                |
| Contact                           | 3a | Provide name, institutional affiliation, and e-mail address of all protocol authors; provide physical mailing address of corresponding author                                                   | <input checked="" type="checkbox"/> | <input type="checkbox"/>            | 3-14           |
| Contributions                     | 3b | Describe contributions of protocol authors and identify the guarantor of the review                                                                                                             | <input checked="" type="checkbox"/> | <input type="checkbox"/>            | 239-242        |
| <b>Amendments</b>                 | 4  | If the protocol represents an amendment of a previously completed or published protocol, identify as such and list changes; otherwise, state plan for documenting important protocol amendments | <input type="checkbox"/>            | <input checked="" type="checkbox"/> |                |
| <b>Support</b>                    |    |                                                                                                                                                                                                 |                                     |                                     |                |
| Sources                           | 5a | Indicate sources of financial or other support for the review                                                                                                                                   | <input checked="" type="checkbox"/> | <input type="checkbox"/>            | 243-244        |
| Sponsor                           | 5b | Provide name for the review funder and/or sponsor                                                                                                                                               | <input checked="" type="checkbox"/> | <input type="checkbox"/>            | 243-244        |
| Role of sponsor/funder            | 5c | Describe roles of funder(s), sponsor(s), and/or institution(s), if any, in developing the protocol                                                                                              | <input checked="" type="checkbox"/> | <input type="checkbox"/>            | 243-244        |
| <b>INTRODUCTION</b>               |    |                                                                                                                                                                                                 |                                     |                                     |                |
| <b>Rationale</b>                  | 6  | Describe the rationale for the review in the context of what is already known                                                                                                                   | <input checked="" type="checkbox"/> | <input type="checkbox"/>            | 55-108         |
| <b>Objectives</b>                 | 7  | Provide an explicit statement of the question(s) the review will address with reference to participants, interventions, comparators, and outcomes (PICO)                                        | <input checked="" type="checkbox"/> | <input type="checkbox"/>            | 23-33          |

| Section/topic                             | #   | Checklist item                                                                                                                                                                                                                              | Information reported                |                          | Line number(s)     |
|-------------------------------------------|-----|---------------------------------------------------------------------------------------------------------------------------------------------------------------------------------------------------------------------------------------------|-------------------------------------|--------------------------|--------------------|
|                                           |     |                                                                                                                                                                                                                                             | Yes                                 | No                       |                    |
| <b>METHODS</b>                            |     |                                                                                                                                                                                                                                             |                                     |                          |                    |
| <b>Eligibility criteria</b>               | 8   | Specify the study characteristics (e.g., PICO, study design, setting, time frame) and report characteristics (e.g., years considered, language, publication status) to be used as criteria for eligibility for the review                   | <input checked="" type="checkbox"/> | <input type="checkbox"/> | 118-151            |
| <b>Information sources</b>                | 9   | Describe all intended information sources (e.g., electronic databases, contact with study authors, trial registers, or other grey literature sources) with planned dates of coverage                                                        | <input checked="" type="checkbox"/> | <input type="checkbox"/> | 155-162            |
| <b>Search strategy</b>                    | 10  | Present draft of search strategy to be used for at least one electronic database, including planned limits, such that it could be repeated                                                                                                  | <input checked="" type="checkbox"/> | <input type="checkbox"/> | 163-177            |
| <b>STUDY RECORDS</b>                      |     |                                                                                                                                                                                                                                             |                                     |                          |                    |
| Data management                           | 11a | Describe the mechanism(s) that will be used to manage records and data throughout the review                                                                                                                                                | <input checked="" type="checkbox"/> | <input type="checkbox"/> | 185-230            |
| Selection process                         | 11b | State the process that will be used for selecting studies (e.g., two independent reviewers) through each phase of the review (i.e., screening, eligibility, and inclusion in meta-analysis)                                                 | <input checked="" type="checkbox"/> | <input type="checkbox"/> | 179-184            |
| Data collection process                   | 11c | Describe planned method of extracting data from reports (e.g., piloting forms, done independently, in duplicate), any processes for obtaining and confirming data from investigators                                                        | <input checked="" type="checkbox"/> | <input type="checkbox"/> | 185-194            |
| <b>Data items</b>                         | 12  | List and define all variables for which data will be sought (e.g., PICO items, funding sources), any pre-planned data assumptions and simplifications                                                                                       | <input checked="" type="checkbox"/> | <input type="checkbox"/> | 187-190            |
| <b>Outcomes and prioritization</b>        | 13  | List and define all outcomes for which data will be sought, including prioritization of main and additional outcomes, with rationale                                                                                                        | <input checked="" type="checkbox"/> | <input type="checkbox"/> | 142-151            |
| <b>Risk of bias in individual studies</b> | 14  | Describe anticipated methods for assessing risk of bias of individual studies, including whether this will be done at the outcome or study level, or both; state how this information will be used in data synthesis                        | <input checked="" type="checkbox"/> | <input type="checkbox"/> | 195-206            |
| <b>DATA</b>                               |     |                                                                                                                                                                                                                                             |                                     |                          |                    |
| <b>Synthesis</b>                          | 15a | Describe criteria under which study data will be quantitatively synthesized                                                                                                                                                                 | <input checked="" type="checkbox"/> | <input type="checkbox"/> | 207-210            |
|                                           | 15b | If data are appropriate for quantitative synthesis, describe planned summary measures, methods of handling data, and methods of combining data from studies, including any planned exploration of consistency (e.g., $I^2$ , Kendall's tau) | <input checked="" type="checkbox"/> | <input type="checkbox"/> | 210-214<br>221-224 |
|                                           | 15c | Describe any proposed additional analyses (e.g., sensitivity or subgroup analyses, meta-regression)                                                                                                                                         | <input checked="" type="checkbox"/> | <input type="checkbox"/> | 225-230            |
|                                           | 15d | If quantitative synthesis is not appropriate, describe the type of summary planned                                                                                                                                                          | <input checked="" type="checkbox"/> | <input type="checkbox"/> | 212-214            |
| <b>Meta-bias(es)</b>                      | 16  | Specify any planned assessment of meta-bias(es) (e.g., publication bias across studies, selective                                                                                                                                           | <input checked="" type="checkbox"/> | <input type="checkbox"/> | 218-220            |

1  
2  
3  
4  
5  
6  
7  
8  
9  
10  
11  
12  
13  
14  
15  
16  
17  
18  
19  
20  
21  
22  
23  
24  
25  
26  
27  
28  
29  
30  
31  
32  
33  
34  
35  
36  
37  
38  
39  
40  
41  
42  
43  
44  
45  
46  
47

| Section/topic                            | #  | Checklist item                                                                   | Information reported                |                          | Line number(s) |
|------------------------------------------|----|----------------------------------------------------------------------------------|-------------------------------------|--------------------------|----------------|
|                                          |    |                                                                                  | Yes                                 | No                       |                |
|                                          |    | reporting within studies)                                                        |                                     |                          |                |
| <b>Confidence in cumulative evidence</b> | 17 | Describe how the strength of the body of evidence will be assessed (e.g., GRADE) | <input checked="" type="checkbox"/> | <input type="checkbox"/> | 195-200        |

For peer review only

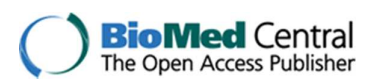

Supplement: bmjopen-2017-020434.draft_revisions.pdf [file bmjopen-2017-020434.draft_revisions.pdf]
